# Supplementary material
Source: PubMed Central journal article supplement (PMC4788266)
Supplement: nobd889725.ww1_default.pdf [file nobd889725.ww1_default.pdf]

# Appendix

## *Details of search strategy*

Database: Ovid MEDLINE(R) <1948 to February week 1 2011> Search Strategy:

- 1 diabetes mellitus, type 2/ or prediabetic state/ (64110)
- 2 diabetes.tw. (233161)
- 3 ("type 2" or type two or type ii or type II).tw. (131044)
- 4 2 and 3 (46990)
- 5 1 or 4 (77482)
- 6 prediabetic state.tw. (208)
- 7 pre-diabetic.tw. (396)
- 8 6 or 7 (602)
- 9 5 or 8 (77756)
- 10 odds ratio/ or exp risk/ or regression analysis/ or "sensitivity and specificity"/ or roc curve/ (935102)
- 11 (risk adj3 (score\$ or predict\$ or factor\$ or model\$ or assess\$ or calculat\$ or analys\$ or screen\$)).tw. (298546)
- 12 10 or 11 (1044213)
- 13 9 and 12 (19631)
- 14 limit 13 to humans (19334)
- 15 limit 14 to (classical article or clinical trial, all or clinical trial, phase i or clinical trial, phase ii or clinical trial, phase iii or clinical trial, phase iv or clinical trial or comparative study or controlled clinical trial or "corrected and republished article" or evaluation studies or introductory journal article or journal article or meta analysis or multicenter study or randomized controlled trial or "review" or technical report or validation studies) (18375)
- 16 \*diabetes mellitus, type 2/ or \*prediabetic state/ (49993)
- 17 15 and 16 (12176)
- 18 11 and 17 (6169)

\*\*\*\*\*

The Medline search, searched for type two diabetes in the thesaurus and also in free text. Relevant statistical terms in the thesaurus search were combined with the word risk adjacent within three words of other key words in the search. In order to narrow the search further the function to focus on diabetes or prediabetic state as the main focus of the article was chosen. The relevant statistical terms and the risk search were combined with the type two diabetes search. This result was combined with the risk adj search to produce the final result. This resulted in 6169 papers.

**Database: EMBASE <1980 to 2011 Week 05> Search Strategy:**

Search Strategy:

- 
- 1 non insulin dependent diabetes mellitus/ (92300)
  - 2 diabetes.tw. (300352)
  - 3 ("type 2" or type two or type ii or type II).tw. (161037)
  - 4 2 and 3 (66250)
  - 5 1 or 4 (108295)
  - 6 non-insulin dependent.tw. (11795)
  - 7 (prediabetic state or pre-diabetic).tw. (793)
  - 8 6 or 7 (12565)
  - 9 5 or 8 (111058)
  - 10 RISK ASSESSMENT/ or RISK FACTOR/ or RISK/ (732204)
  - 11 LOGISTIC REGRESSION ANALYSIS/ (33553)
  - 12 "sensitivity and specificity"/ (133377)
  - 13 receiver operating characteristic/ (14334)
  - 14 (risk adj3 (score\$ or predict\$ or factor\$ or model\$ or assess\$ or calculat\$ or analys\$ or screen\$)).tw. (381302)
  - 15 10 or 11 or 12 or 13 or 14 (1013026)
  - 16 9 and 15 (25922)
  - 17 limit 16 to human (22923)
  - 18 14 and 17 (12551)
  - 19 \*non insulin dependent diabetes mellitus/ (58830)
  - 20 18 and 19 (6947)

\*\*\*\*\*

The EMBASE search, searched for type two diabetes in the thesaurus and also in free text. Relevant statistical terms in the thesaurus search were combined with the word risk adjacent within three words of other key words in the search. The relevant statistical terms and the risk search were combined with the type two diabetes search. In order to narrow the search further the function to focus on non insulin dependent diabetes mellitus as the main focus of the article was chosen. This result was combined with the risk adj search to produce the final result. This resulted in 6947 papers.

**Database: Ovid MEDLINE(R) In-Process & Other Non-Indexed Citations <February 09, 2011>**

**Search Strategy:**

- 
- 1 diabetes.tw. (10421)
  - 2 ("type 2" or type two or type ii or type II).tw. (5982)
  - 3 prediabetic state.tw. (7)
  - 4 pre-diabetic.tw. (22)
  - 5 (risk adj3 (score\$ or predict\$ or factor\$ or model\$ or assess\$ or calculat\$ or analys\$ or screen\$)).tw. (14580)
  - 6 1 and 2 (3254)
  - 7 3 or 4 or 6 (3271)
  - 8 5 and 7 (524)

\*\*\*\*\*

The text word strategy was used only for unindexed MEDLINE papers resulting in 524 papers.

**COCHRANE LIBRARY**

**Search History**

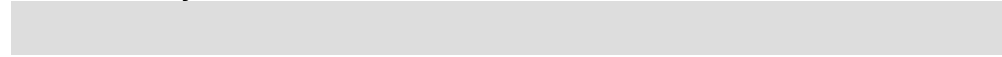

|    |                                                           |       |
|----|-----------------------------------------------------------|-------|
| #1 | MeSH descriptor Diabetes Mellitus, Type 2, this term only | 6547  |
| #2 | MeSH descriptor Risk explode all trees                    | 23562 |
| #3 | (#1 AND #2)                                               | 716   |

A MESH search only was performed in the Cochrane Library for Type 2 Diabetes Mellitus and Risk resulting in 716 titles.
